# Supplementary material for: Selective hydrolysis of peptides promoted by metal ions: a positional scanning approachElectronic supplementary information (ESI) available: Fig. S1, details of peptide synthesis, fluorescamine reactions, and of HPLC analyses. See http://www.rsc.org/suppdata/cc/b2/b202285k/
Source: Royal Society of Chemistry journal article supplement (doi:10.1039/b202285k), 2002-06-11
Supplement: b202285k.doc [file b202285k.doc]

# Supplementary Material (ESI) for Chemical Communications

# This journal is © The Royal Society of Chemistry 2002

Selective hydrolysis of peptides promoted by metal ions: a positional scanning approach

Tjasa Bantan-Polak*a,b* and Kathryn B. Grant**a*

a Department of Chemistry, Center for Biotechnology and Drug Design, Georgia State University, University Plaza, Atlanta, GA 30303-3083, USA. Fax: 404-651-1416; Tel: 404-651-0613; E-mail: [kbgrant@gsu.edu](mailto:kbgrant@gsu.edu)

*b Current Address: Research and Development Division, Lek Pharmaceutical and Chemical Company D.D., Verovskova 57, 1000 Ljubljana, Slovenia*

# Solid phase peptide synthesis

Individual acetylated dipeptides and positional scanning library samples were prepared from 2-chlorotrityl chloride resin (1.08 mmol/g) by established manual solid phase synthesis protocols using activated Fmoc-glycine, Fmoc-leucine, and Fmoc-methionine monomer units.1 All coupling, Fmoc deprotection, and acetylation reactions proceeded to greater than 99.5% completion as accessed by ninhydrin and/or chloranil tests.1*a,d,e* Coupling and Fmoc deprotection were further confirmed by derivatization of peptides with dabsyl chloride and subsequent reversed-phase HPLC analysis.2 The procedures employed for preparation of the individual acetylated dipeptides AcMet-Gly, AcMet-Leu, AcMet-Met, AcLeu-Met, AcGly-Gly, AcGly-Met, AcLeu-Leu, AcLeu-Gly, and AcGly-Leu are as follows.

*Addition of First Amino Acid*.1*b,e,f* A sample of 2-chlorotrityl chloride resin (250 mg, 0.27 mmol) was placed in a dried 10 ml glass reaction vessel, shaken in 6 ml of dry DCM for 5 min, and drained. To the resin were added 1.5 equiv. of Fmoc amino acid monomer (0.4 mmol, recrystallized from dry dioxane x 3) and DIPEA (175 l, 1.0 mmol) dissolved in 6 ml of dry DCM. The coupling reaction was shaken for 3 to 4 h at room temperature, after which the resin was washed with DMF (2 x 2 min), treated with a 10 ml solution of DCM/MeOH/DIPEA (80:15:5; 2 x 10 min), and washed again with DMF (3 x 6 min). In the final step, the Fmoc group was removed with 10 ml of 30% piperidine in DMF (8 x 5 min) and the resin was washed with DMF (6 x 1 min), isopropanol (3 x 1 min), and hexane (4 x 1 min).

*Estimation of Level of First Residue Attachment*.1*e* Immediately prior to the removal of the Fmoc group, experimental resin substitution was calculated using the formula: Loading (mmol/g) = (Absresin)/(mg of resin x 1.75), where Absresinequals absorbance at 290 nm produced by ~1 mol resin suspended in 20% piperidine in DMF. The resulting loading value was compared to theoretical resin substitution calculated according to the formula: Loading (mmol/g) = B (mmol/g) x 1000/[1000 + (B (mmol/g) x (M – 36))], where B equals the substitution of starting resin and M equals the molecular weight of the starting amino acid with protective groups. This comparison indicated that first residue attachment was quantitative for all nine acetylated dipeptides.

*Addition of Second Amino Acid.*1*e* A total of 5 equiv. of Fmoc amino acid monomer (1.35 mmol), HOBt (182.4 mg, 1.35 mmol) and PyBOP (702.4 mg, 1.35 mmol) was dissolved in a minimal amount of DMF, followed by the addition of 10 equiv. of DIPEA (471.4 l, 2.7 mmol). The solution was agitated vigorously for 1 min at room temperature and transferred to the *N*-deblocked peptidyl resin (0.27 mmol). The ensuing coupling reaction was shaken for 2 - 4 h at room temperature, after which the resin was drained and washed with DMF (3 x 20 min). The *N*-terminal Fmoc group was removed as described above.

*N Acetylation.*1*c*A 6 ml solution of acetic anhydride/pyridine/DMF (1:2:3) was transferred to the peptidyl resin and was reacted at room temperature (2 x 60 min). The resin was drained, washed with DMF (6 x 1 min), isopropanol (3 x 1 min), and hexane (4 x 1 min), and dried *in vacuo* for 18 h.

*Cleavage from the Resin.*1*e* A total of 3 ml of TFA/TIS/water/EDT (94:1:2.5:2.5) was added to the acetylated peptidyl resin (0.27 mmol) in a 50 ml round bottomed flask. The mixture was flushed with argon and was allowed to react at room temperature for 3 h. The resin was then removed by filtration and washed twice with 100% TFA. The combined filtrates were transferred to 1.7 ml microcentrifuge tubes upon which the TFA scavenger solution was evaporated in a centrifugal vacuum concentrator to leave a glassy peptide film. The precipitated peptide was washed five times with cold ether, dissolved in water, and lyophilized to yield a white powder. (Under the reaction conditions employed, cleavage of peptides from 2-chlorotrityl chloride resin is quantitative within 15 min.) Overall yields for synthesis of the nine acetylated dipeptides were from 85 to 95%. Purity was confirmed by HPLC analyses.

*Stepwise Analysis of Peptide Synthesis.*1*a,d,e,* 2 Small samples of resin were taken after each coupling, deprotection, and *N*-acetylation step. In order to test for the presence and absence of primary amino groups, the resin samples were subjected to ninhydrin and/or chloranil tests as previously described.1*a,d,e*

### Table 1: Gradient elution scheme

|  | **Time (min)** | **Mobile phase A (%)** | **Mobile phase B (%)** |
| --- | --- | --- | --- |
|  |  |  |  |
|  | 0 | 80 | 20 |
|  | 25 | 55 | 45 |
|  | 30 | 0 | 100 |
|  | 31 | 80 | 20 |
|  | 50 | 80 | 20 |
|  |  |  |  |

In order to verify removal of the Fmoc group and to ensure the presence of the various dipeptides comprising individual positional scanning library samples, HPLC analysis was conducted after each deprotection step.2 A total of 5 mg of dried resin was transferred to a 1.7 ml microcentrifuge tube. The resin was treated for 20 min with 0.5 ml of TFA/TIS/water/EDT (94:1:2.5:2.5) in a thermomixer set at 40 °C. After removal of the resin by filtration, the cleaved peptide was lyophilized to dryness, dissolved in 500 l of water, and re-lyophilized to a white powder. The peptide was then dissolved in 45 l of water, 15 l of 1 M sodium bicarbonate buffer pH 10, and 60 l of 25 mM dabsyl chloride in acetone. The resulting solution was reacted at 70 °C for 15 min, chilled on ice, and diluted with 120 l of ethanol. Twenty µl of the sample were analyzed on a Beckman System Gold HPLC system equipped with a Varian MICROSORB-MV™ C18 5 µm, 100 Å, 4.6 x 250 mm reversed-phase column. Using gradient elution (Table 1), separations were conducted at 50 °C with a flow rate of 1 ml/min, mobile phase A (2% DMF in 20 mM sodium phosphate buffer pH 6.5), and mobile phase B (6% DMF in CH3CN).

Dabsylated peptides were detected by UV absorption at 466 nm. Analysis of the chromatograms ensured complete removal of the N-terminal Fmoc group after each deprotection reaction. At the dipeptide stage, the absence of monomer peaks ensured that the preceding coupling reaction was carried out to completion.

*Split-and-Mix Synthesis.*3 The acetylated dipeptide positional scanning library is comprised of two sub-libraries AcOX and AcXO (where O represents the spatially addressed amino acid Gly, Leu, or Met and X represents an equimolar mixture of Gly, Leu, and Met). The library was synthesized by standard "split-and-mix" methods3 on 2-chlorotrityl chloride resin using the manual solid phase synthesis protocols as described for individual acetylated dipeptides. Typical OX samples were prepared by equally dividing 300 mg (0.324 mmol) of resin into three reaction vessels. Each of the three resin aliquots was then coupled to one of three amino acid, either Gly, Leu, or Met. After estimation of the first amino acid attachment (UV test described above) and Fmoc group removal, the resin was washed and dried *in vacuo*. The aliquots were recombined, mixed, and equally divided into three clean reaction vessels for coupling to the defined amino acid O followed by acetylation and then cleavage from the resin. Alternatively, to prepare XO library samples, a total of 900 mg (0.972 mmol) of resin was equally divided into three reaction vessels. Each of the three resin aliquots was then coupled to the defined amino acid O (either Gly, Leu, or Met), further divided into three new reaction vessels, and coupled again to Gly, Leu, or Met. Following the second coupling reaction, the contents of the three reaction vessels corresponding to each Oaa group were recombined, acetylated, and cleaved from the resin.

##### **Fluorometric microplate detection of metal-assisted peptide hydrolysis**4

A total of 4 l of each library and individual peptide hydrolysis reaction (8-24 nmol total peptide), 90 l of 0.1% (wt/v) fluorescamine dissolved in acetonitrile, 15 l of 0.1M sodium borate buffer pH 8, and 191 l of water were transferred to the wells of a flat-bottomed microplate. The solutions were reacted at room temperature for 5 min, after which the microplate was read for fluorescence in a FLUOstar microplate reader equipped with a high energy xenon flash lamp (405 nm excitation filter, 485 nm emission filter). In order to correct for background fluorescence, blanks consisting of water (to substitute for peptide), buffer, and fluorescamine dissolved in acetonitrile were loaded into microplate wells.

## HPLC analysis of peptide hydrolysis reaction products2

Amino acids released upon PdII-assisted peptide hydrolysis of each library and individual peptide sample were identified by HPLC analysis of their dabsylated derivatives. In each case, the hydrolysis reaction (167 to 500 nmol total peptide) was lyophilized to dryness and dissolved in 45 l of water, 15 l of 1 M sodium bicarbonate buffer pH 10, and 60 l of 25 mM dabsyl chloride in acetone. Solutions were reacted at 70 °C for 15 min, chilled on ice, and diluted with an equivalent volume of EtOH (120 µl). Twenty µl of each sample (14 to 42 nmol of peptide) were analyzed on a Beckman System Gold HPLC system equipped with a Varian MICROSORB-MV™ C18 5 µm, 100 Å, 4.6 x 250 mm reversed-phase column. Separations were conducted using 2% DMF in 20 mM sodium phosphate buffer pH 6.5 and 6% DMF in CH3CN as described above. Dabsylated glycine, leucine and methionine hydrolysis products were detected by UV absorption at 466 nm and their identities were confirmed by comparison of retention times to corresponding dabsylated amino acid standards. Appropriate dabsylated standards were then included in the reaction mixtures and were shown to enhance hydrolysis peaks corresponding to glycine, leucine and methionine.

## Figure S1

**Fig. S1** Relative fluorescence intensities produced by individual positional scanning library samples treated with PdII, CdII, CeIII, CrIII, FeIII, and MnII (6 mM total peptide, 10 mM metal salt, 68 mM trifluoroacetic acid pH 1.7, 45 °C, 5 h). In control reactions, metal salt was substituted by an equivalent volume of water.

**Notes and references**

† Abbreviations: DCM = dichloromethane, DIPEA = *N,N’*-diisopropylethylamine, DMF = *N,N’*-dimethylformamide, EDT = 1,2-ethanedithiol, HOBT = *N*-hydroxybenzotriazole, PyBOP = benzotriazole-1-yl-oxytris-pyrrolidinophosphonium hexafluorophosphate, TFA = trifluoroacetic acid, TIS = triisopropylsilane.

1. *(a)* E.T. Kaiser, R.L. Colescott, C.D. Blossinger and P.I. Cook, *Anal. Biochem.*, 1970, **34,** 595; *(b)* K. Barlos, O. Chatzi, D. Gatos and G. Stavropoulos, *Int. J. Pept. Protein Res.,* 1991, **37,** 513; *(c)* J. Eichler and R.A. Houghten, *Biochemistry,* 1993, **32**, 11035; *(d)* T. Vojkovsky, *Pept. Res.*, 1995, **8,** 236; *(e)* P. D. White and W. C. Chan, Basic Procedures, in *Fmoc Solid Phase Peptide Synthesis,* eds. W. C. Chan and P. D. White, Oxford University Press Inc., New York, 2000, p 41; *(f)* K. Barlos and D. Gatos, Convergent Peptide Synthesis, in *Fmoc Solid Phase Peptide Synthesis,* eds. W. C. Chan and P. D. White, Oxford University Press Inc., New York, 2000, p 215.
2. *(a)* J.-Y. Chang, R. Knecht and D.G. Braun, *Methods Enzymol*., 1983*,* **91,** 41; *(b)* K.B. Grant and S. Pattabhi, *Anal. Biochem.*, 2001, **289**, 196.
3. A. Furka and W.D. Bennet, *Comb. Chem. High Throughput Screen,* 1999, **2,** 105.
4. T. Bantan-Polak, M. Kassai and K.B. Grant, *Anal. Biochem.,* 2001, **297**, 128.
